# Supplementary material for: Mixed lanthanide–organic frameworks with borono groups for colorimetric detection of excess fluoride levels in rivers
Source: Royal Society of Chemistry journal article supplement (doi:10.1039/d4qi00630e), 2024-01-01
Supplement: d4qi00630e1.pdf [file d4qi00630e1.pdf]

## Supporting Information

### **Mixed lanthanide-organic frameworks with borono groups for colorimetric detection of excess fluoride levels in rivers**

Hui Min,<sup>\*a</sup> Zhuohang Zhu,<sup>a</sup> Meiyi Huang,<sup>a</sup> Junbao Zhou,<sup>a</sup> Nian Zhao,<sup>a</sup> and Peng Cheng<sup>\*b</sup>

<sup>a</sup> Hubei Key Laboratory of Pollutant Analysis & Reuse Technology, College of Chemistry and Chemical Engineering, Hubei Normal University, Huangshi 435002, P. R. China.

<sup>b</sup> Department of Chemistry, Key Laboratory of Advanced Energy Material Chemistry, Frontiers Science Center for New Organic Matter, Haihe Laboratory of Sustainable Chemical Transformations (Tianjin), College of Chemistry, Nankai University, Tianjin 300071, P. R. China.

\* Authors to whom correspondence should be addressed: [minhui@hbnu.edu.cn](mailto:minhui@hbnu.edu.cn) and [pcheng@nankai.edu.cn](mailto:pcheng@nankai.edu.cn).

## Table of content

|                 |                                                                                                                          |     |
|-----------------|--------------------------------------------------------------------------------------------------------------------------|-----|
| <b>Fig. S1</b>  | Simplified topological configuration of <b>7</b> .                                                                       | S3  |
| <b>Fig. S2</b>  | PXRD patterns of <b>1 – 7</b> .                                                                                          | S4  |
| <b>Fig. S3</b>  | IR curves of <b>1 – 7</b> .                                                                                              | S5  |
| <b>Fig. S4</b>  | PXRD patterns of <b>7</b> after immersing in water for 48 h and the simulated one of <b>7</b> .                          | S6  |
| <b>Fig. S5</b>  | TGA curves of <b>1 – 7</b> .                                                                                             | S7  |
| <b>Fig. S6</b>  | Luminescence emission spectra of aqueous suspensions of <b>1 – 7</b> .                                                   | S8  |
| <b>Fig. S7</b>  | Luminescent stability of aqueous suspensions of <b>1 – 7</b> .                                                           | S9  |
| <b>Fig. S8</b>  | Fluorescence spectra of <b>1 – 4</b> and <b>6 – 7</b> aqueous dispersions vary with F <sup>-</sup> concentrations.       | S10 |
| <b>Fig. S9</b>  | Fluorescence response of <b>5</b> towards F <sup>-</sup> ions.                                                           | S11 |
| <b>Fig. S10</b> | S-V plots of <b>1 – 4</b> and <b>6 – 7</b> aqueous dispersions towards F <sup>-</sup> ions.                              | S12 |
| <b>Fig. S11</b> | PXRD of <b>5</b> before and after treating with 30 ppm F <sup>-</sup> ions.                                              | S13 |
| <b>Fig. S12</b> | XPS of <b>5</b> before and after treating with F <sup>-</sup> ions.                                                      | S14 |
| <b>Fig. S13</b> | IR of <b>5</b> before and after treating with F <sup>-</sup> ions.                                                       | S15 |
| <b>Fig. S14</b> | UV absorption spectrum of H <sub>2</sub> BIPA and 77 K phosphorescence spectrum of isomorphous Gd <sub>2</sub> -MOF.     | S16 |
| <b>Fig. S15</b> | Ultraviolet-visible spectra of <b>5</b> aqueous dispersion vary with F <sup>-</sup> ion concentrations                   | S17 |
| <b>Fig. S16</b> | Lifetime at 544 nm of <b>5</b> aqueous dispersions towards F <sup>-</sup> with different concentrations.                 | S18 |
| <b>Fig. S17</b> | Lifetime at 616 nm of <b>5</b> aqueous dispersions towards F <sup>-</sup> with different concentrations.                 | S19 |
| <b>Fig. S18</b> | Lifetimes at 544 nm and 616 nm of <b>5</b> aqueous dispersions towards F <sup>-</sup> with different concentrations.     | S20 |
| <b>Table S1</b> | EA and ICP-AES results for <b>1 – 8</b> .                                                                                | S21 |
| <b>Table S2</b> | Crystal data and structural refinement parameters for <b>7</b> and F@ <b>7</b> .                                         | S22 |
| <b>Table S3</b> | Coordination configuration of the Eu1 and Eu2 calculated by <i>Shape 2.0</i> .                                           | S23 |
| <b>Table S4</b> | Performance summary of <b>1 – 7</b> toward F <sup>-</sup> ions.                                                          | S24 |
| <b>Table S5</b> | Spike-and-recovery experiments                                                                                           | S25 |
| <b>Table S6</b> | Lifetime at 544 nm and 616 nm of <b>5</b> aqueous dispersions towards F <sup>-</sup> ions with different concentrations. | S26 |

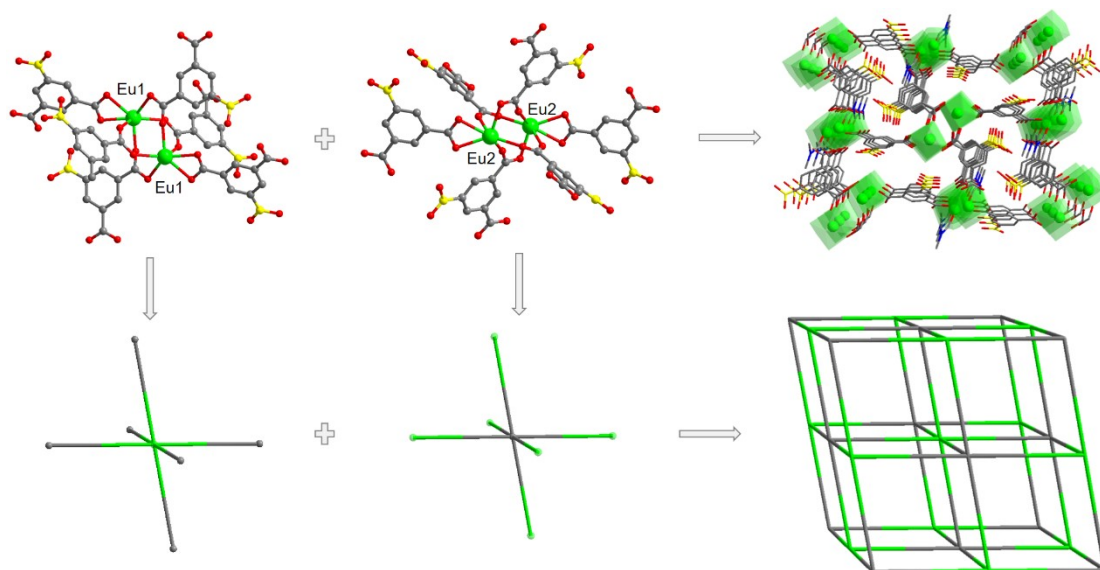

**Fig. S1** The connected modes of binuclear {Eu<sub>2</sub>} units and their simplified topological configuration.

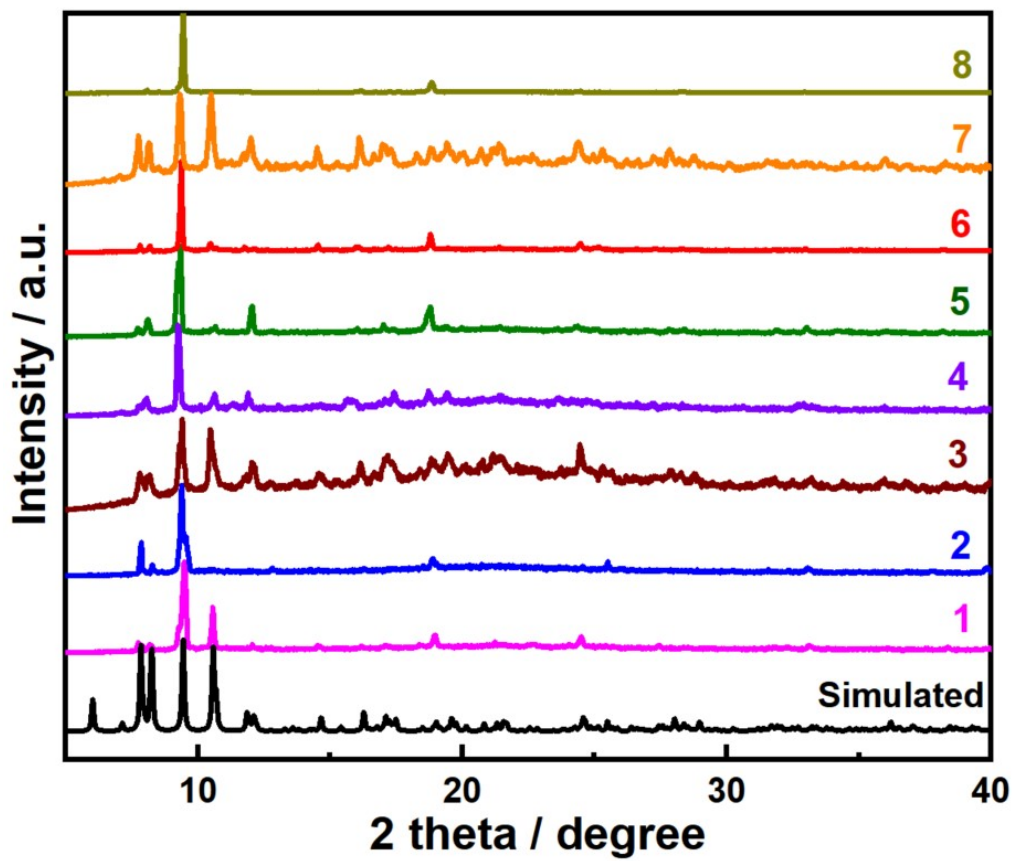

Fig. S2 PXRD patterns of as-synthesized 1 – 8 and the simulated one of 7.

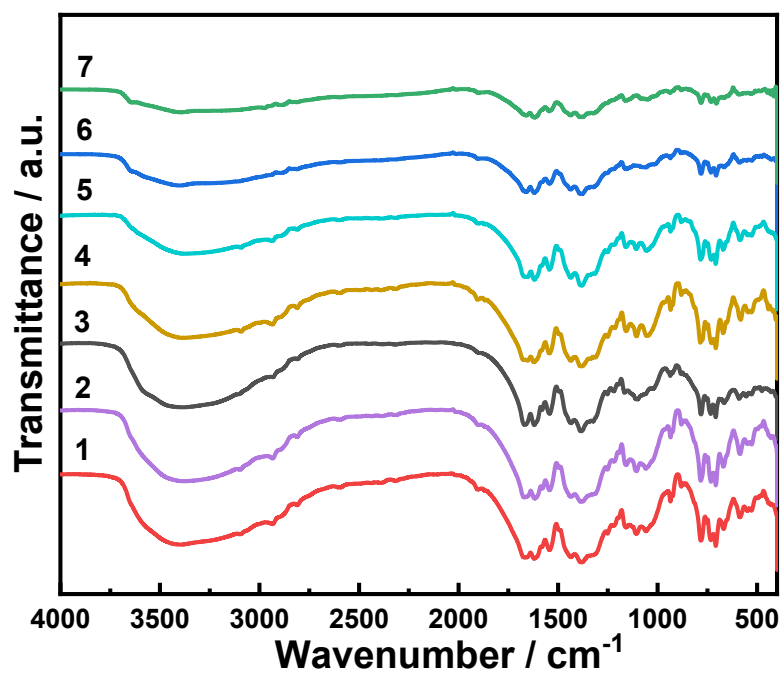

Fig. S3 IR curves of as-synthesized 1 – 7.

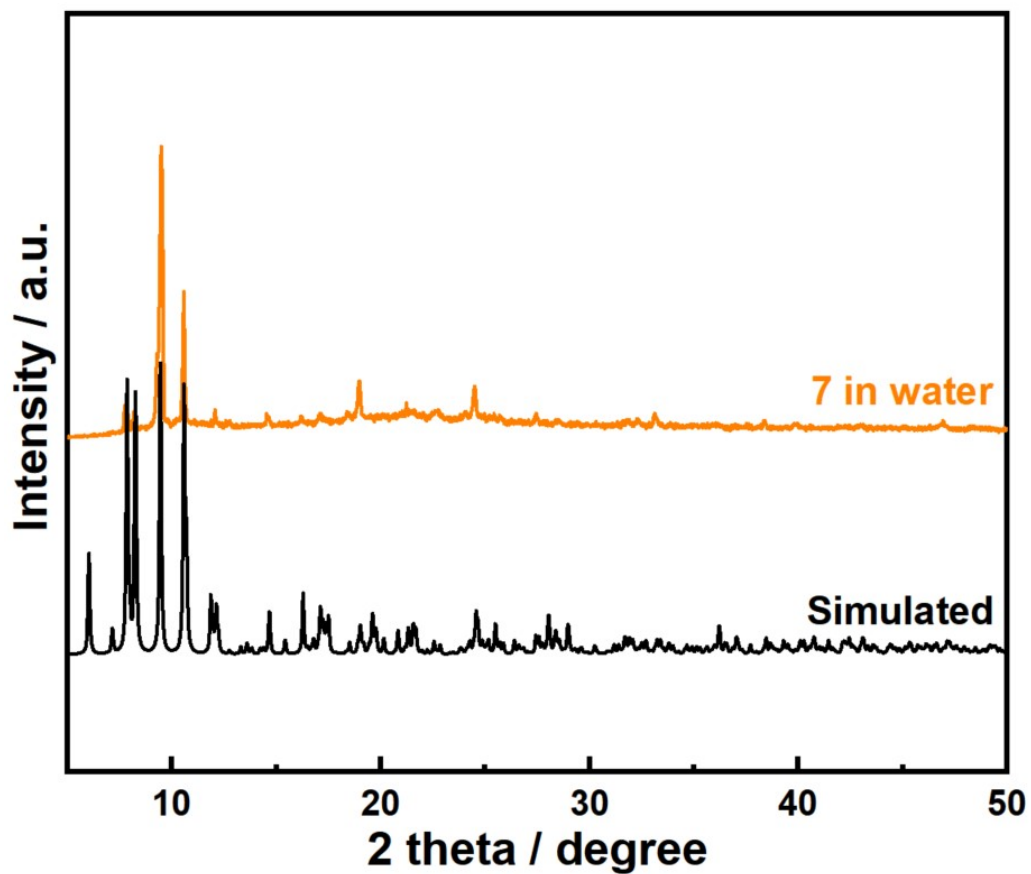

Fig. S4 PXRd patterns of 7 after immersing in water for 48 h and the simulated one of 7.

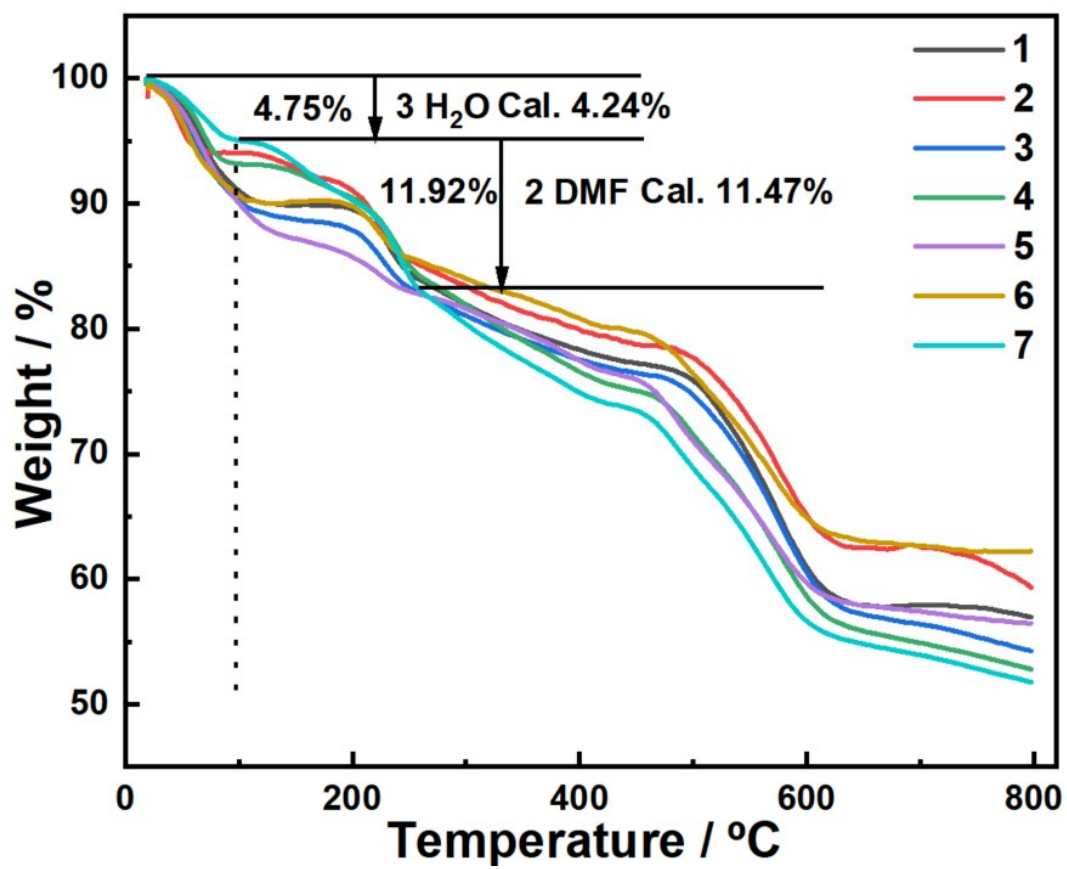

Fig. S5 TGA curves of as-synthesized 1 – 7.

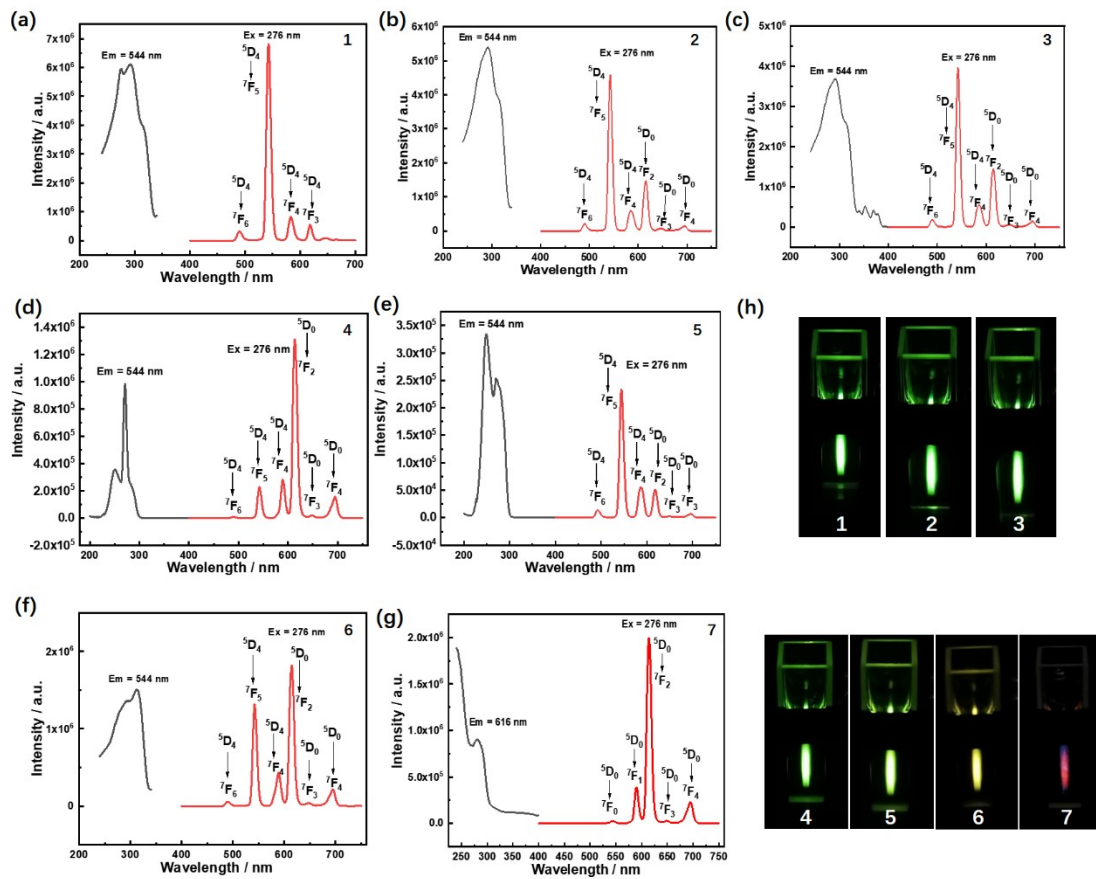

**Fig. S6** Luminescence emission spectra (a – g) and luminescence pictures (h) of aqueous suspensions of 1 – 7.



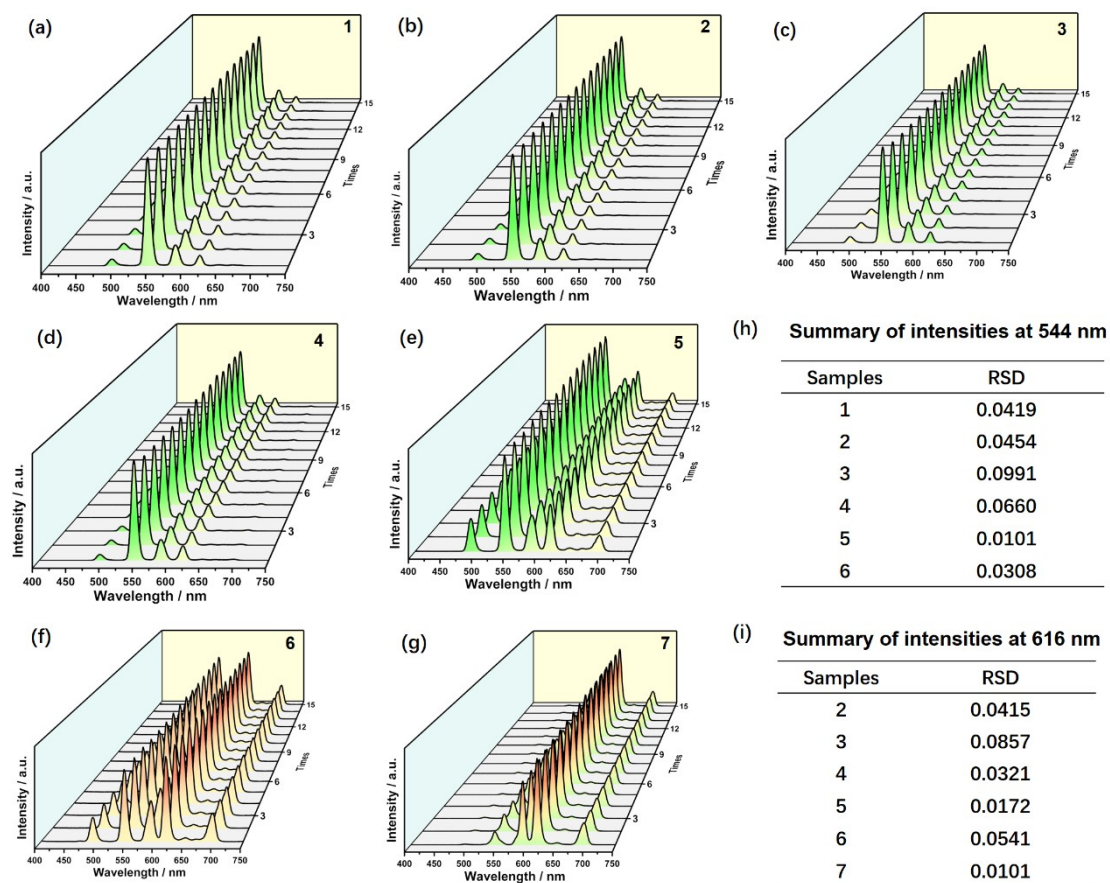

**Fig. S7** Luminescent stability of aqueous suspensions of 1 – 7 for 15 min (a – g) and relative standard deviation (RSD) at 544 nm (h) or 616 nm (i).

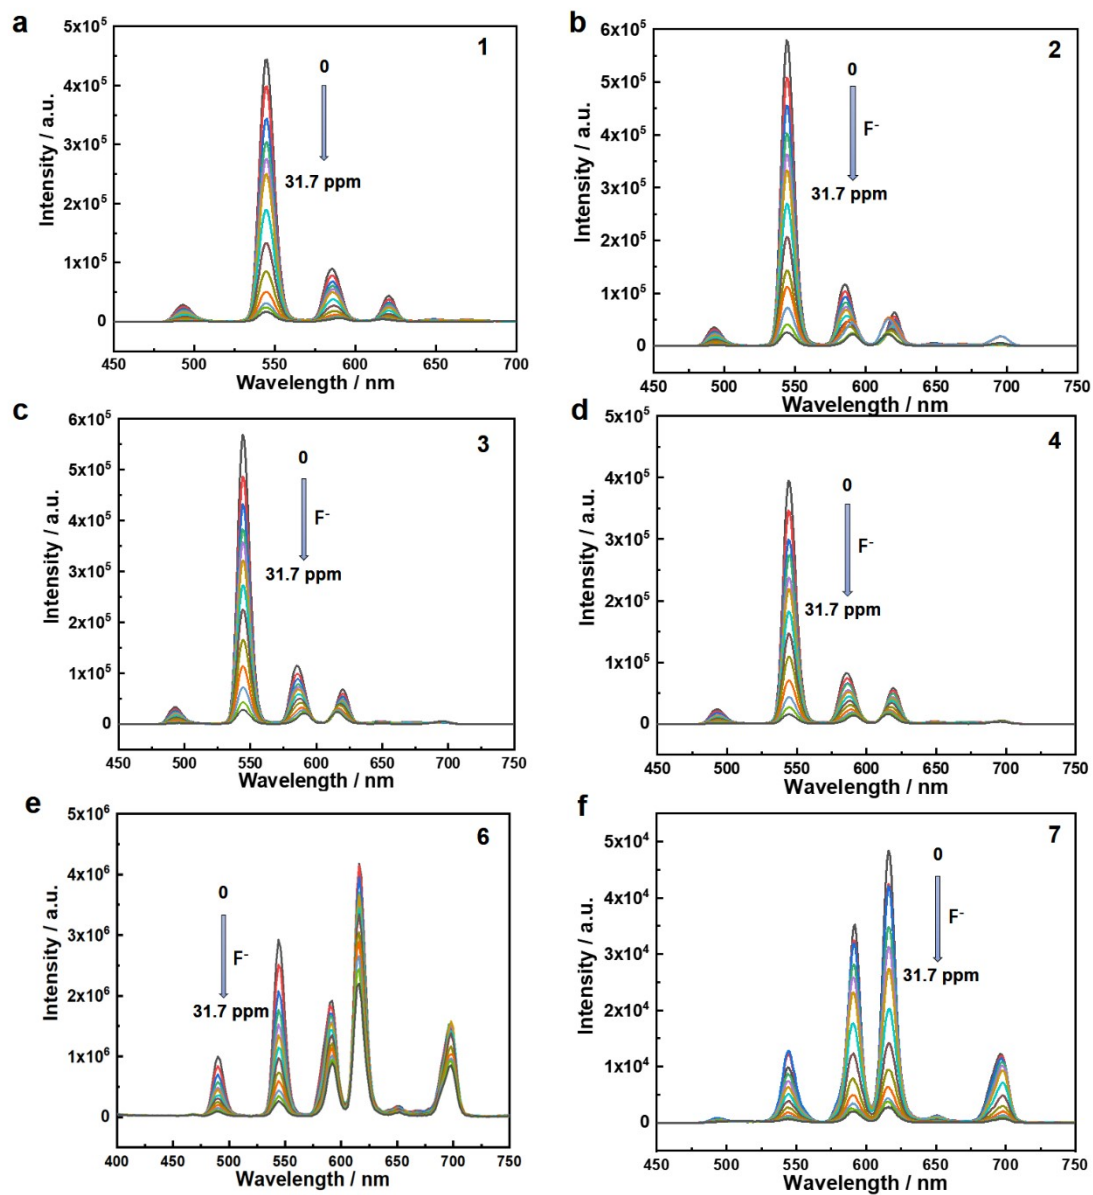

**Fig. S8** Fluorescence spectra of **1 – 4** and **6 – 7** aqueous dispersions vary with  $F^-$  ion concentrations.

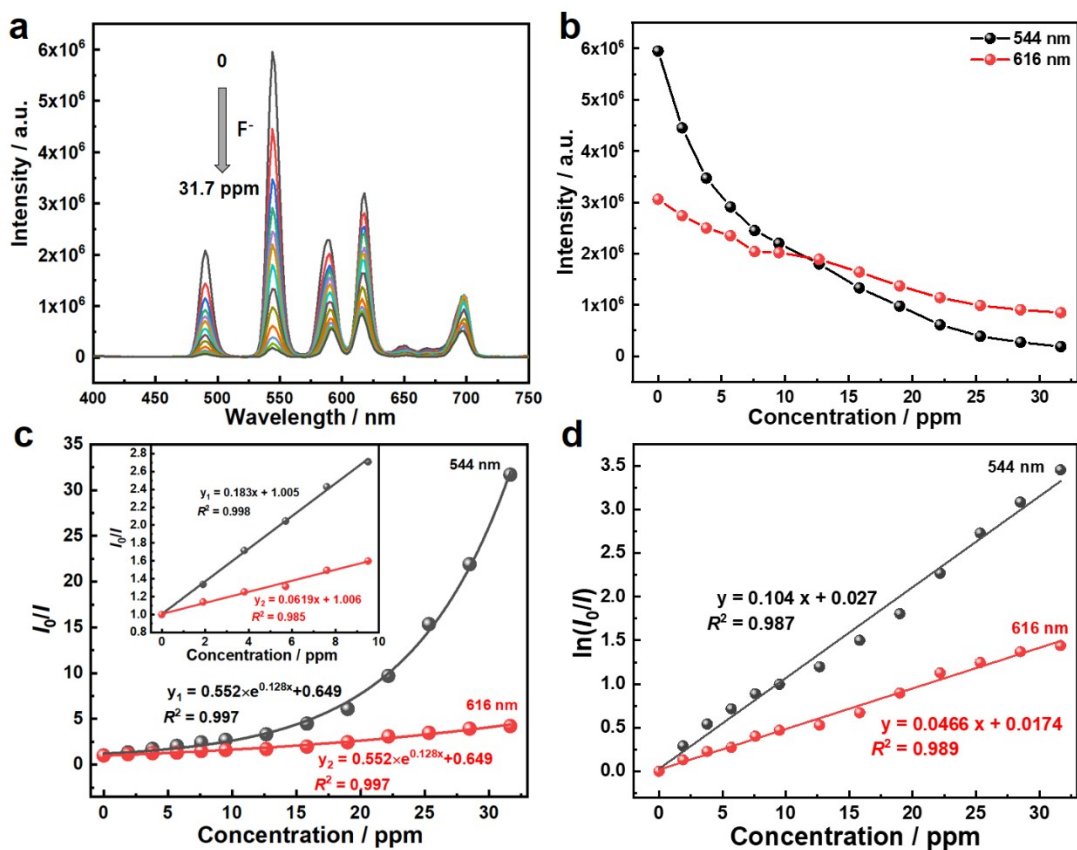

**Fig. S9** Fluorescence response curves (a) and intensity (b) of **5** aqueous dispersions towards F<sup>-</sup> with different concentrations. (c) Experimental S-V plots and the fitted result. Inset shows the linear fitting results at low concentration of F<sup>-</sup> ions. (d) Linear fitting results of  $\ln(I_0/I)$  and concentration.

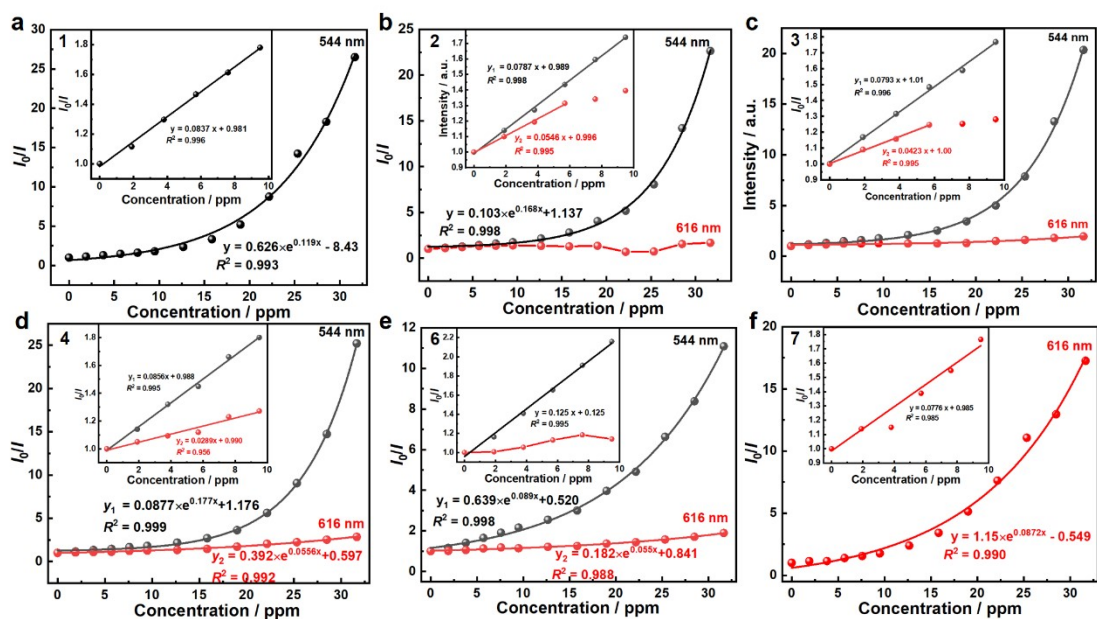

**Fig. S10** S-V plots of 1 – 4 and 6 – 7 aqueous dispersions towards F<sup>-</sup> ions with different concentrations, inset show the linear fit results at low concentration.

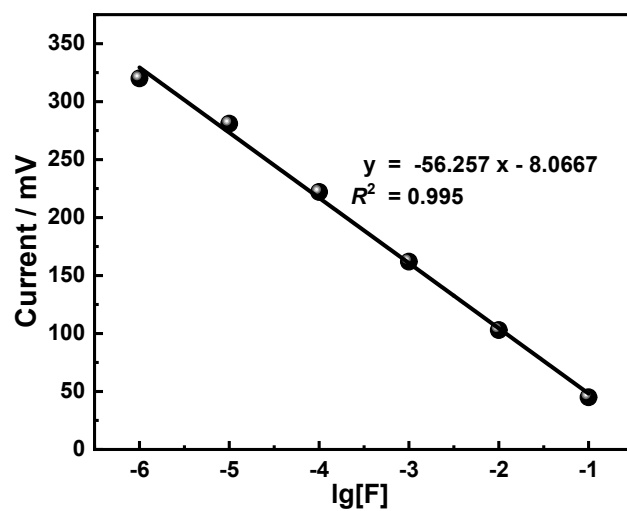

**Fig. S11** Standard curve for F<sup>-</sup> ion detection using F<sup>-</sup> ion selective electrode.

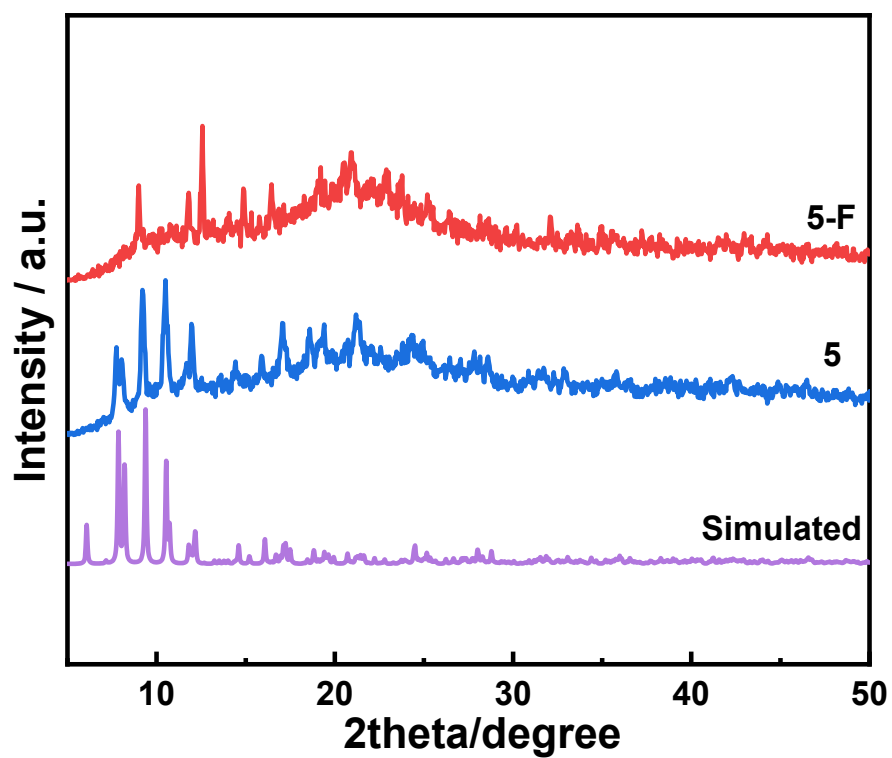

Fig. S12 PXRD patterns of **5** before and after treating with 30 ppm F<sup>-</sup> ions.

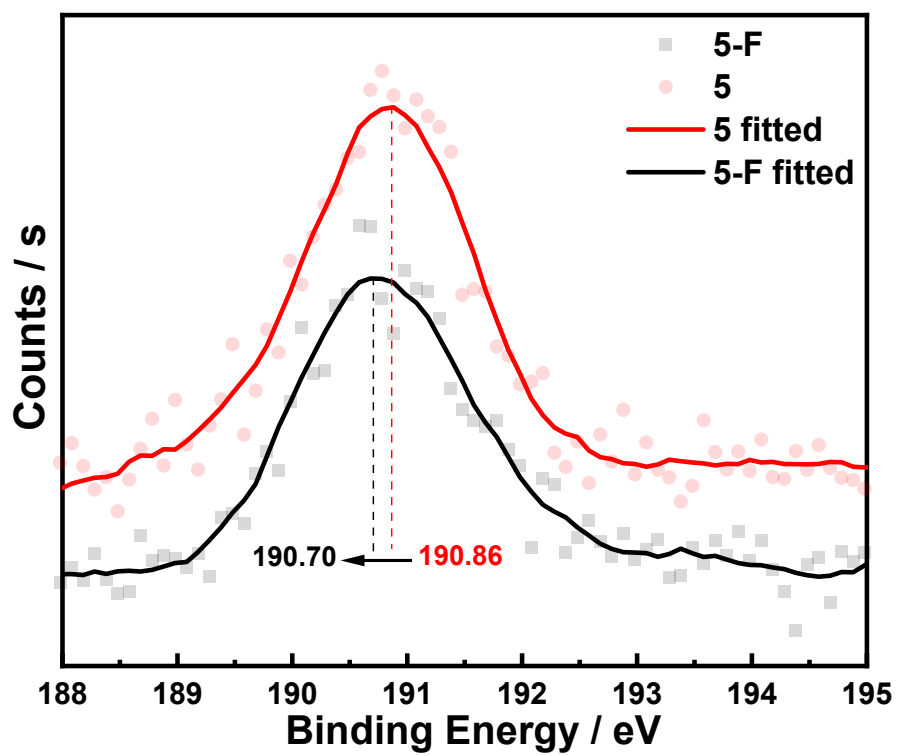

Fig. S13 XPS spectra of **5** before and after treating with F<sup>-</sup> ions.

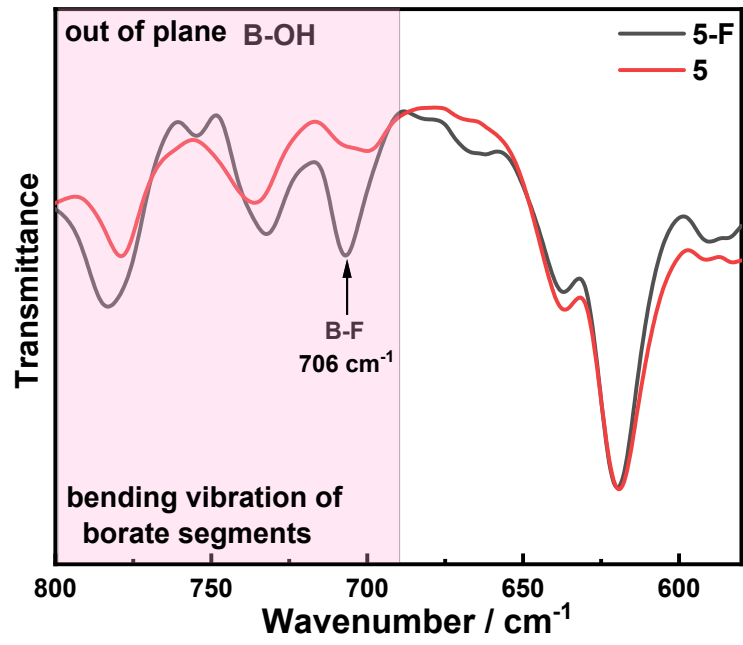

**Fig. S14** IR curves of **5** before and after treating with  $\text{F}^-$  ions.



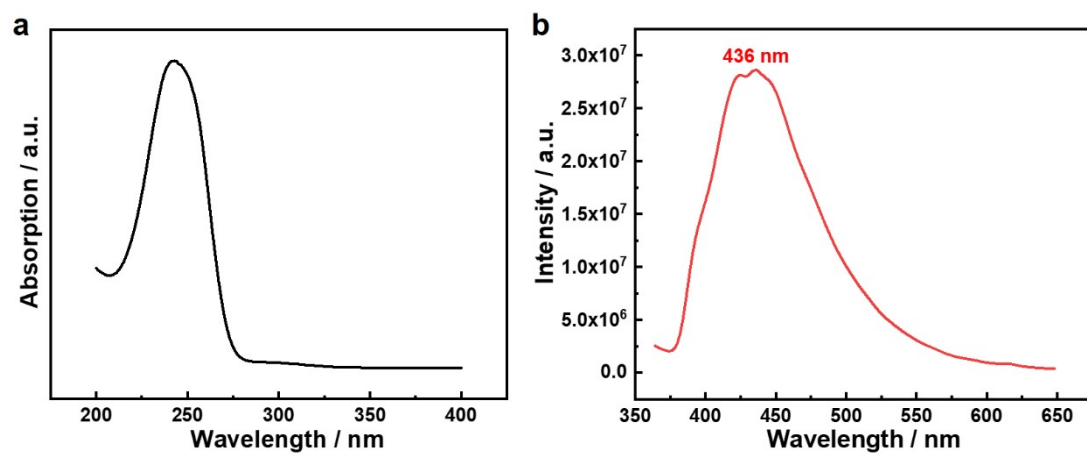

**Fig. S15** (a) UV absorption spectrum of H<sub>2</sub>BIPA and (b) 77 K phosphorescence spectrum of **8**.

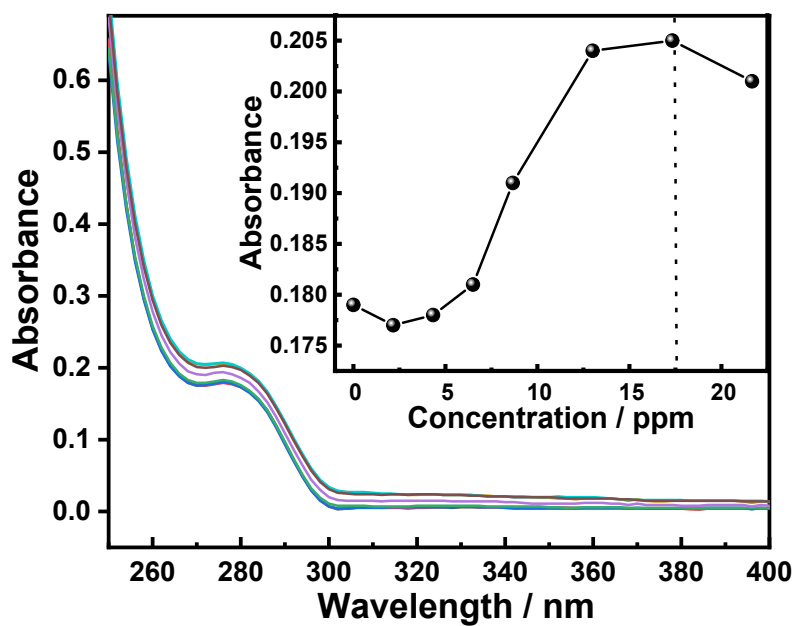

**Fig. S16** Ultraviolet-visible absorption spectra of **5** aqueous dispersion vary with F<sup>-</sup> ion concentrations, inset shows the absorbance at 278 nm at different concentration.

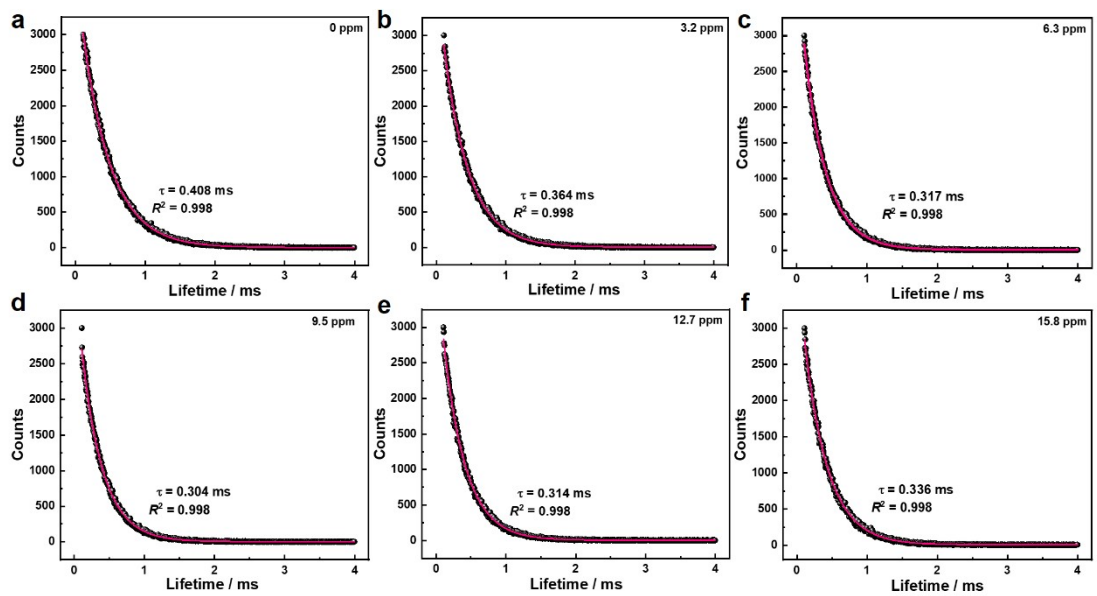

**Fig. S17** Lifetimes at 544 nm of **5** aqueous dispersions towards  $F^-$  ions with different concentrations.

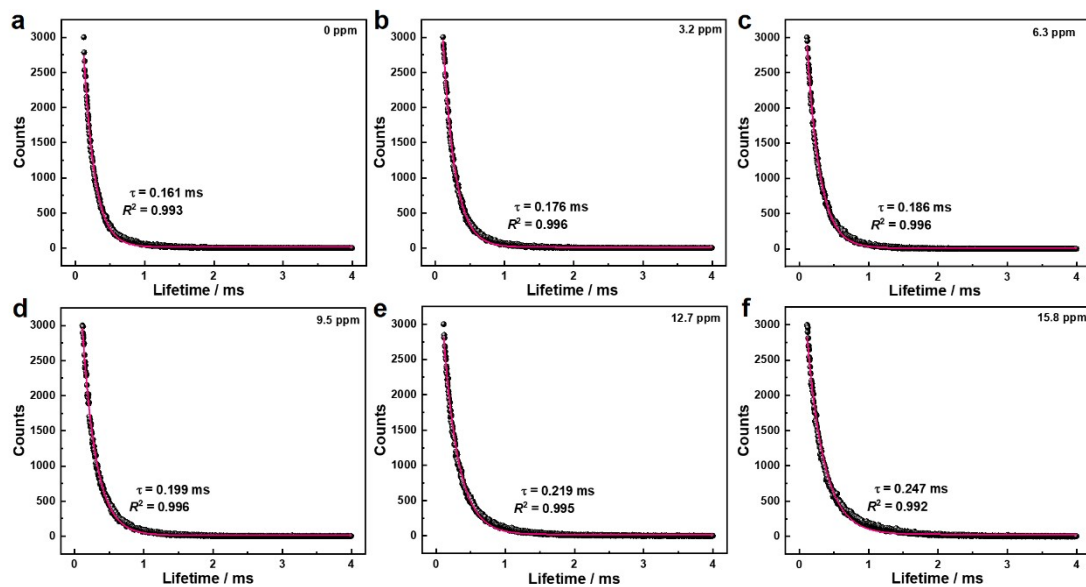

**Fig. S18** Lifetimes at 616 nm of **5** aqueous dispersions towards  $F^-$  ions with different concentrations.

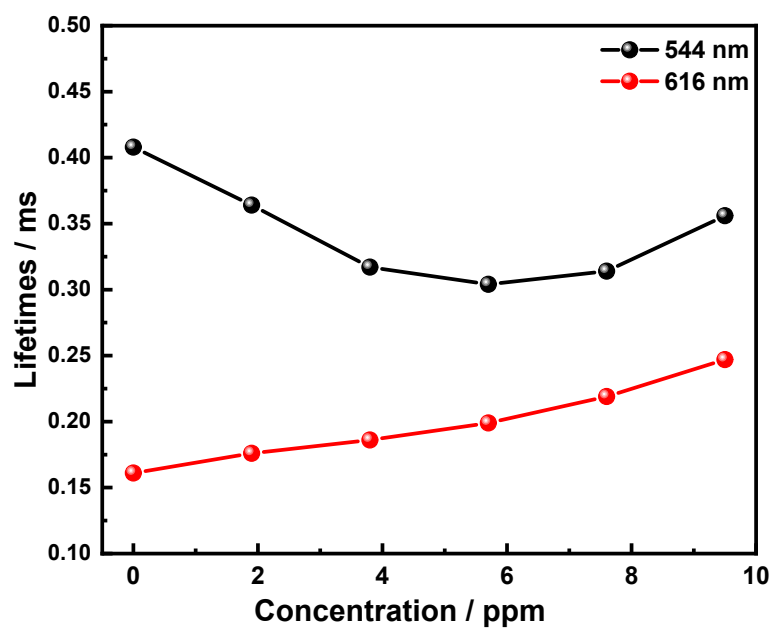

**Fig. S19** Lifetimes at 544 nm and 616 nm of **5** aqueous dispersions towards  $F^-$  ions with different concentrations.

**Table S1** EA and ICP-AES results for **1 – 7**.

| Compounds | Addition/mL                        | EA results (%) |      |       | ICP-AES results |      |      |
|-----------|------------------------------------|----------------|------|-------|-----------------|------|------|
|           | Tb <sup>3+</sup> :Eu <sup>3+</sup> | Elements       | N    | C     | H               | Tb   | Eu   |
| <b>1</b>  | 1.00:0.00                          | Calcd          | 3.26 | 30.77 | 3.89            | 1    | -    |
|           |                                    | Found          | 2.93 | 30.93 | 4.34            |      |      |
| <b>2</b>  | 0.95:0.05                          | Calcd          | 3.27 | 30.79 | 3.89            | 0.94 | 0.06 |
|           |                                    | Found          | 3.09 | 30.65 | 4.04            |      |      |
| <b>3</b>  | 0.90:0.10                          | Calcd          | 3.27 | 30.82 | 3.89            | 0.86 | 0.14 |
|           |                                    | Found          | 3.43 | 30.40 | 4.10            |      |      |
| <b>4</b>  | 0.80:0.20                          | Calcd          | 3.27 | 30.82 | 3.89            | 0.85 | 0.15 |
|           |                                    | Found          | 2.74 | 30.48 | 4.35            |      |      |
| <b>5</b>  | 0.60:0.40                          | Calcd          | 3.28 | 30.89 | 3.90            | 0.66 | 0.34 |
|           |                                    | Found          | 2.99 | 30.62 | 4.01            |      |      |
| <b>6</b>  | 0.40:0.60                          | Calcd          | 3.28 | 30.95 | 3.91            | 0.48 | 0.52 |
|           |                                    | Found          | 3.12 | 30.97 | 4.20            |      |      |
| <b>7</b>  | 0.00:1.00                          | Calcd          | 3.30 | 31.11 | 3.93            | -    | 1    |
|           |                                    | Found          | 3.23 | 31.30 | 4.04            |      |      |

ICP-AES results show the normalized atomic ratio.

**Table S2** Crystal data and structural refinement parameters for **7** and F@**7**.

| Compounds                                                                                              | <b>7</b>                                                                                        | F@ <b>7</b>                                                                                                     |
|--------------------------------------------------------------------------------------------------------|-------------------------------------------------------------------------------------------------|-----------------------------------------------------------------------------------------------------------------|
| Formula                                                                                                | C <sub>30</sub> H <sub>40</sub> B <sub>3</sub> Eu <sub>2</sub> N <sub>2</sub> O <sub>25.5</sub> | C <sub>30</sub> H <sub>47</sub> B <sub>3</sub> Eu <sub>2</sub> N <sub>2</sub> O <sub>29</sub> F <sub>0.25</sub> |
| Formula weight                                                                                         | 1172.99                                                                                         | 1256.79                                                                                                         |
| Crystal system                                                                                         | triclinic                                                                                       | triclinic                                                                                                       |
| Space group                                                                                            | <i>P</i> -1                                                                                     | <i>P</i> -1                                                                                                     |
| <i>a</i> (Å)                                                                                           | 12.771                                                                                          | 12.670                                                                                                          |
| <i>b</i> (Å)                                                                                           | 14.199                                                                                          | 14.235                                                                                                          |
| <i>c</i> (Å)                                                                                           | 15.899                                                                                          | 16.014                                                                                                          |
| $\alpha$ (°)                                                                                           | 98.717                                                                                          | 98.801                                                                                                          |
| $\beta$ (°)                                                                                            | 106.354                                                                                         | 105.956                                                                                                         |
| $\gamma$ (°)                                                                                           | 114.260                                                                                         | 113.980                                                                                                         |
| <i>V</i> (Å <sup>3</sup> )                                                                             | 2401.4                                                                                          | 2419.31                                                                                                         |
| <i>Z</i>                                                                                               | 2                                                                                               | 2                                                                                                               |
| <i>D<sub>x</sub></i> , g cm <sup>-3</sup>                                                              | 1.622                                                                                           | 1.725                                                                                                           |
| <i>Mu</i> , mm <sup>-1</sup>                                                                           | 2.670                                                                                           | 2.664                                                                                                           |
| F(000)                                                                                                 | 1158.0                                                                                          | 1248.0                                                                                                          |
| GOF on <i>F</i> <sup>2</sup>                                                                           | 1.052                                                                                           | 1.014                                                                                                           |
| <i>R</i> <sub>int</sub>                                                                                | 0.0735                                                                                          | 0.0473                                                                                                          |
| <sup>a</sup> <i>R</i> <sub>1</sub> , <sup>b</sup> <i>wR</i> <sub>2</sub> [ <i>I</i> ≥ 2 σ( <i>I</i> )] | 0.0685 / 0.1746                                                                                 | 0.0410 / 0.1121                                                                                                 |
| <sup>a</sup> <i>R</i> <sub>1</sub> , <sup>b</sup> <i>wR</i> <sub>2</sub> [all data]                    | 0.0981 / 0.1928                                                                                 | 0.0549 / 0.1184                                                                                                 |
| CCDC                                                                                                   | 2326600                                                                                         | 2326601                                                                                                         |

$${}^aR_1 = \sum ||F_o| - |F_c|| / \sum |F_o|; {}^b wR_2 = [\sum w(F_o^2 - F_c^2)^2 / \sum w(F_o^2)^2]^{1/2}.$$

**Table S3** Coordination configuration of the Eu1 and Eu2 calculated by *Shape 2.0*.

| Ions         | Abbreviation            | Point group                  | Configuration                              | Deviation    |
|--------------|-------------------------|------------------------------|--------------------------------------------|--------------|
| Eu1          | OP-8                    | $D_{8h}$                     | Octagon                                    | 30.131       |
|              | HPY-8                   | $C_{7v}$                     | Heptagonal pyramid                         | 22.911       |
|              | HBPY-8                  | $D_{6h}$                     | Hexagonal bipyramid                        | 15.803       |
|              | CU-8                    | $O_h$                        | Cube                                       | 11.456       |
|              | SAPR-8                  | $D_{4d}$                     | Square antiprism                           | 1.728        |
|              | TDD-8                   | $D_{2d}$                     | Triangular dodecahedron                    | 2.628        |
|              | JGBF-8                  | $D_{2d}$                     | Johnson gyrobifastigium J26                | 13.989       |
|              | JETBPY-8                | $D_{3h}$                     | Johnson elongated triangular bipyramid J14 | 26.602       |
|              | JBTPR-8                 | $C_{2v}$                     | Biaugmented trigonal prism J50             | 1.882        |
|              | <b>BTPR-8</b>           | <b><math>C_{2v}</math></b>   | <b>Biaugmented trigonal prism</b>          | <b>0.993</b> |
|              | JSD-8                   | $D_{2d}$                     | Snub diphenoid J84                         | 4.572        |
|              | TT-8                    | $T_d$                        | Triakis tetrahedron                        | 11.859       |
| ETBPY-8      | $D_{3h}$                | Elongated trigonal bipyramid | 22.823                                     |              |
| Eu2          | EP-9                    | $D_{9h}$                     | Enneagon                                   | 33.471       |
|              | OPY-9                   | $C_{8v}$                     | Octagonal pyramid                          | 22.842       |
|              | HBPY-9                  | $D_{7h}$                     | Heptagonal bipyramid                       | 16.220       |
|              | JTC-9                   | $C_{3v}$                     | Johnson triangular cupola J3               | 15.915       |
|              | JCCU-9                  | $C_{4v}$                     | JCCU-9                                     | 10.048       |
|              | CCU-9                   | $C_{4v}$                     | Spherical-relaxed capped cube              | 8.777        |
|              | JCSAPR-9                | $C_{4v}$                     | Capped square antiprism J10                | 2.374        |
|              | CSAPR-9                 | $C_{4v}$                     | Spherical capped square antiprism          | 1.994        |
|              | JTCTPR-9                | $D_{3h}$                     | Tricapped trigonal prism J51               | 3.286        |
|              | TCTPR-9                 | $D_{3h}$                     | Spherical tricapped trigonal prism         | 2.841        |
|              | JTDIC-9                 | $C_{3v}$                     | Tridiminished icosahedron J63              | 13.649       |
|              | HH-9                    | $C_{2v}$                     | Hula-hoop                                  | 8.064        |
| <b>MFF-9</b> | <b><math>C_s</math></b> | <b>Muffin</b>                | <b>0.981</b>                               |              |



**Table S4** Performance summary of **1 – 7** toward F<sup>-</sup> ions.

| Sample   | Sensitivity (ppm <sup>-1</sup> ) |                         | Limit of detection (ppm) |                         |
|----------|----------------------------------|-------------------------|--------------------------|-------------------------|
|          | <i>I</i> <sub>544</sub>          | <i>I</i> <sub>616</sub> | <i>I</i> <sub>544</sub>  | <i>I</i> <sub>616</sub> |
| <b>1</b> | 0.0837                           | -                       | 1.50                     | -                       |
| <b>2</b> | 0.0787                           | 0.0546                  | 1.73                     | 2.28                    |
| <b>3</b> | 0.0793                           | 0.0423                  | 3.74                     | 7.03                    |
| <b>4</b> | 0.0856                           | 0.0289                  | 2.31                     | 3.33                    |
| <b>5</b> | 0.183                            | 0.0619                  | 0.166                    | 0.83                    |
| <b>6</b> | 0.125                            | 0.0190                  | 0.739                    | 8.54                    |
| <b>7</b> | -                                | 0.0776                  |                          | 9.15                    |

**Table S5** Spike-and-recovery experiments of **5** towards F<sup>-</sup> ions in water samples from the Yangtze River.

| Methods                    | Samples | Found (ppm) <sup>[a]</sup> | Added (ppm) | Found (ppm) <sup>[b]</sup> | Recovery | RSD  |
|----------------------------|---------|----------------------------|-------------|----------------------------|----------|------|
| This work                  | 1       | 0.52                       | 12.7        | 12.9                       | 97.4%    |      |
|                            | 2       | 0.75                       | 12.7        | 13.2                       | 98.0%    | 2.3% |
|                            | 3       | 0.28                       | 12.7        | 12.6                       | 97.0%    |      |
| F- ion selective electrode | 1       | 0.79                       | 12.7        | 11.0                       | 82.2%    |      |
|                            | 2       | 0.82                       | 12.7        | 13.0                       | 96.0%    | 8.5% |
|                            | 3       | 0.72                       | 12.7        | 12.5                       | 93.1%    |      |

[a] direct measurement of F<sup>-</sup> ion content in samples; [b] F<sup>-</sup> ion content in samples after adding standard solution.

**Table S6** Lifetime at 544 nm and 616 nm of **5** aqueous dispersions towards F<sup>-</sup> ions with different concentrations.

| Concentration (ppm) | Lifetime / ms |        |
|---------------------|---------------|--------|
|                     | 544 nm        | 616 nm |
| 0                   | 0.408         | 0.161  |
| 1.9                 | 0.364         | 0.176  |
| 3.8                 | 0.317         | 0.183  |
| 9                   | 0.304         | 0.199  |
| 12                  | 0.314         | 0.219  |
| 15                  | 0.356         | 0.247  |
